# Supplementary material
Source: ML conference proceedings conference paper supplement (https://openreview.net/forum?id=IbzDaIDyt6)
Supplement: supplementary_material [file sup.pdf › SM/sup.pdf]

# Enhancing Visual Grounding for GUI Agents via Self-Evolutionary Reinforcement Learning

May 19, 2025

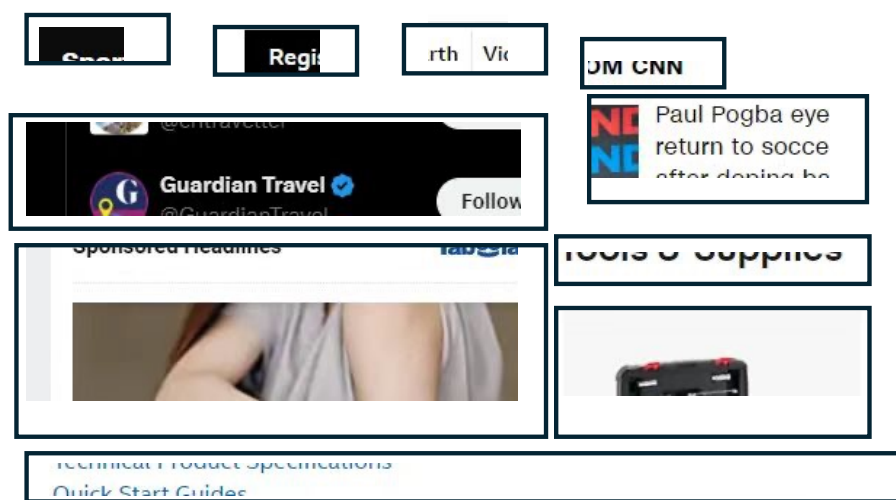

Figure 1: Filtered bad box in seed data curation stage. Most bad cases include some incomplete UI elements or some that contain messy background information.

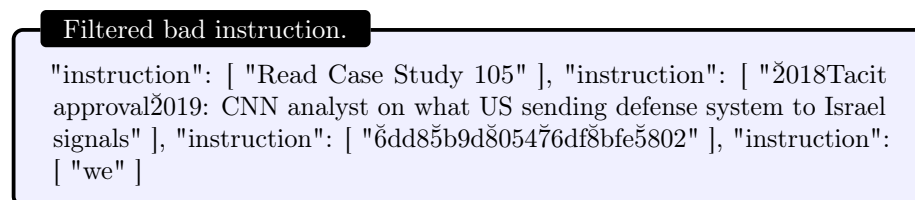

Most web data includes a large number of bad instructions, some of which contain garbled letters, while others are ambiguous, containing only a single word or an unclear phrase .

## Average Attention Map

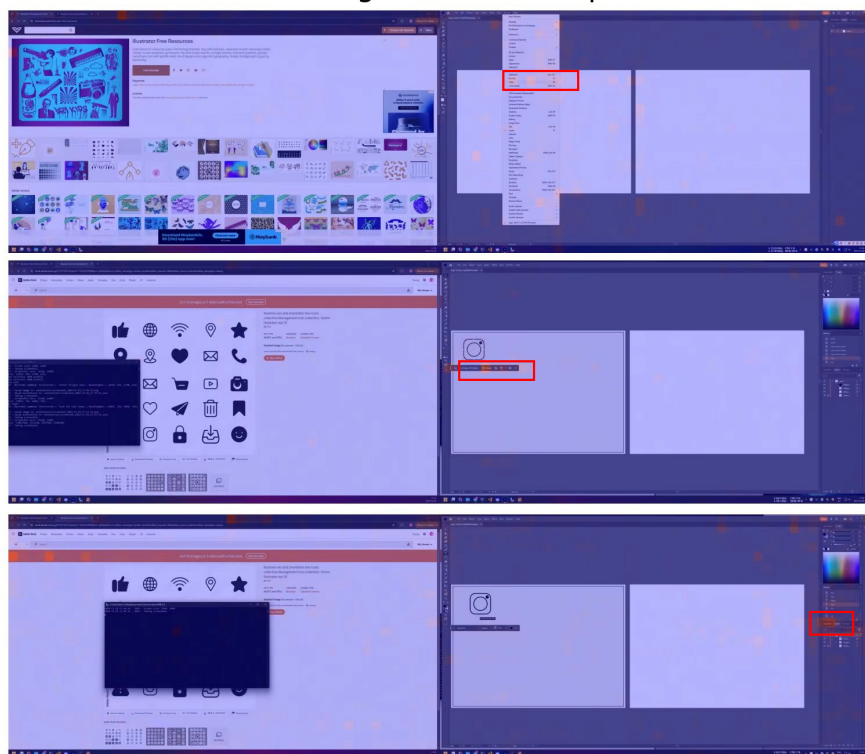

Figure 2: we present more visualization examples of attention maps.
